# Supplementary material
Source: PubMed Central journal article supplement (PMC5411372)

Figure S1

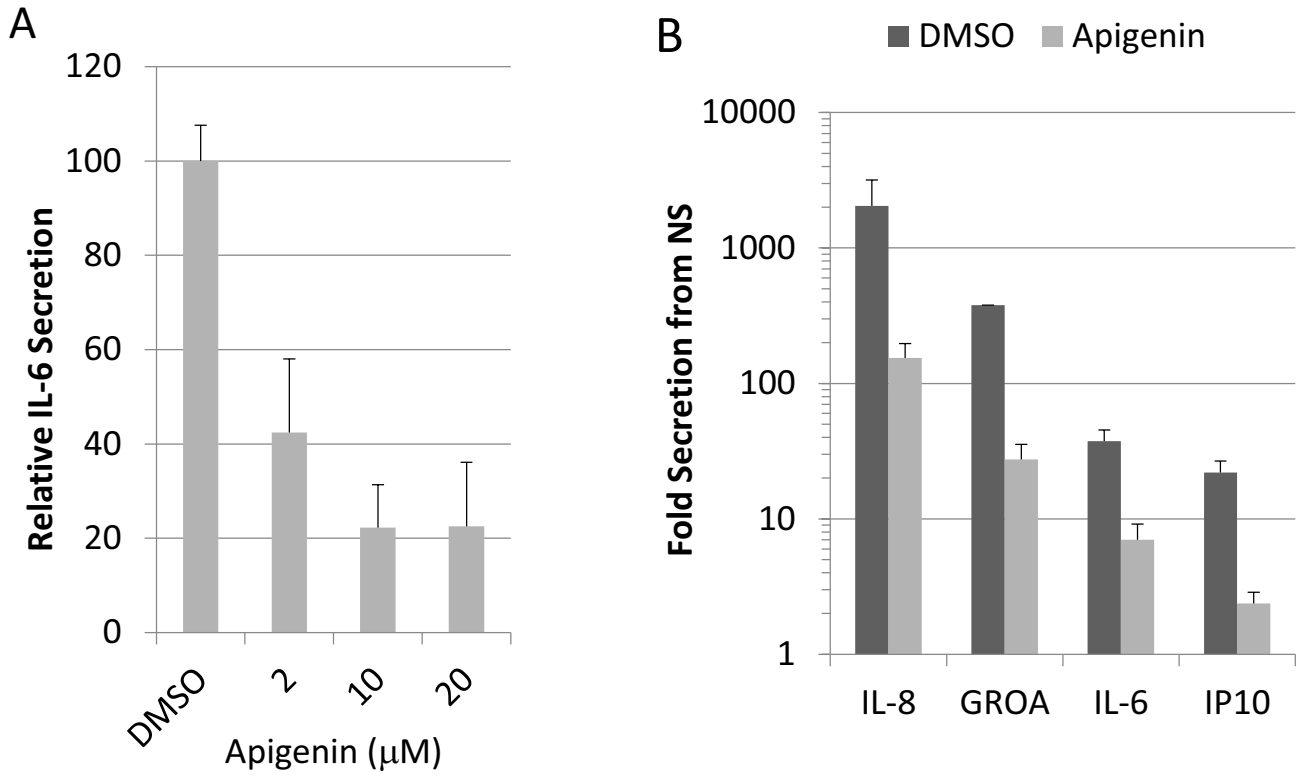

Supplement: 11357_2017_9970_MOESM1_ESM.pdf [file 11357_2017_9970_MOESM1_ESM.pdf]

Figure S2

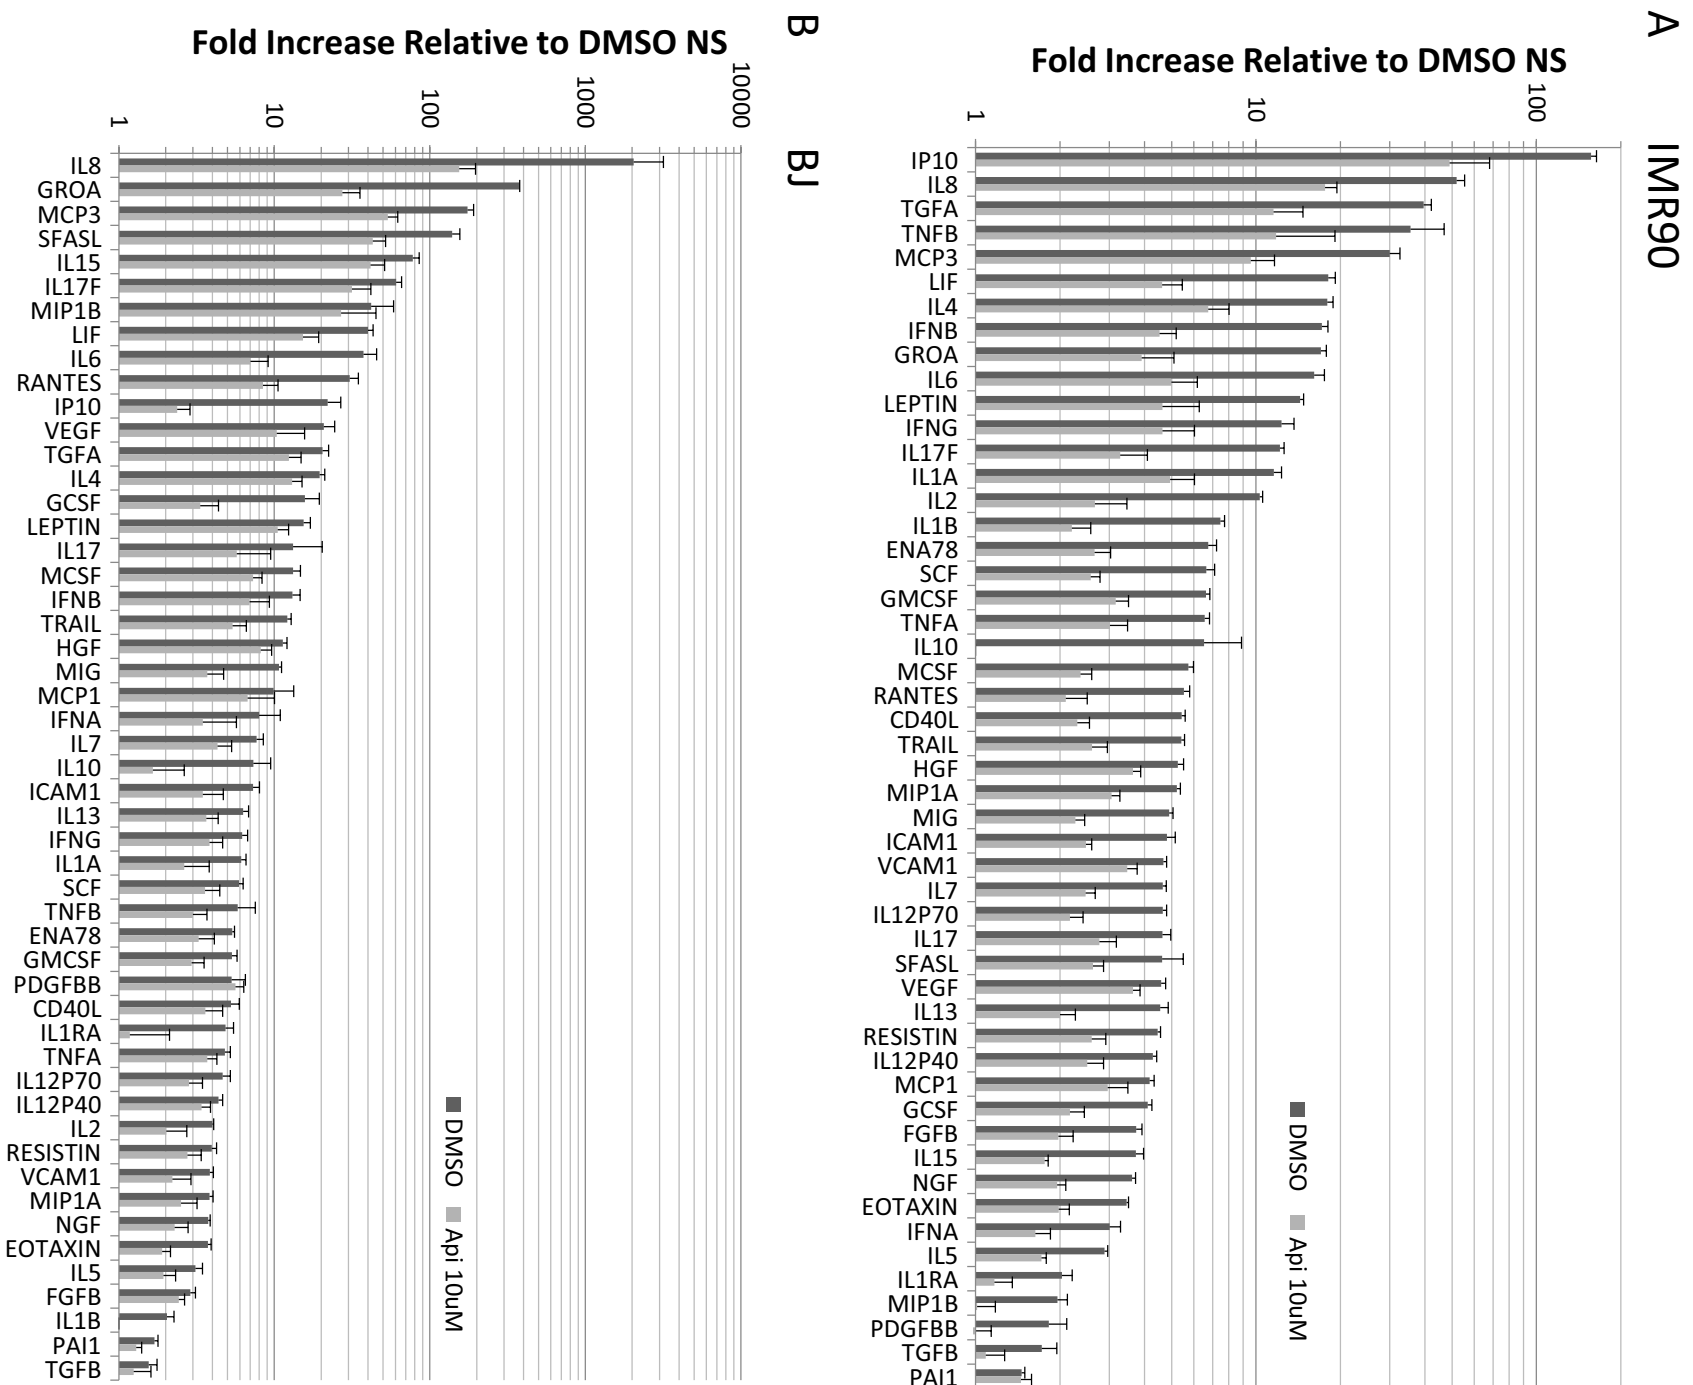

Supplement: 11357_2017_9970_MOESM2_ESM.pdf [file 11357_2017_9970_MOESM2_ESM.pdf]

Figure S3

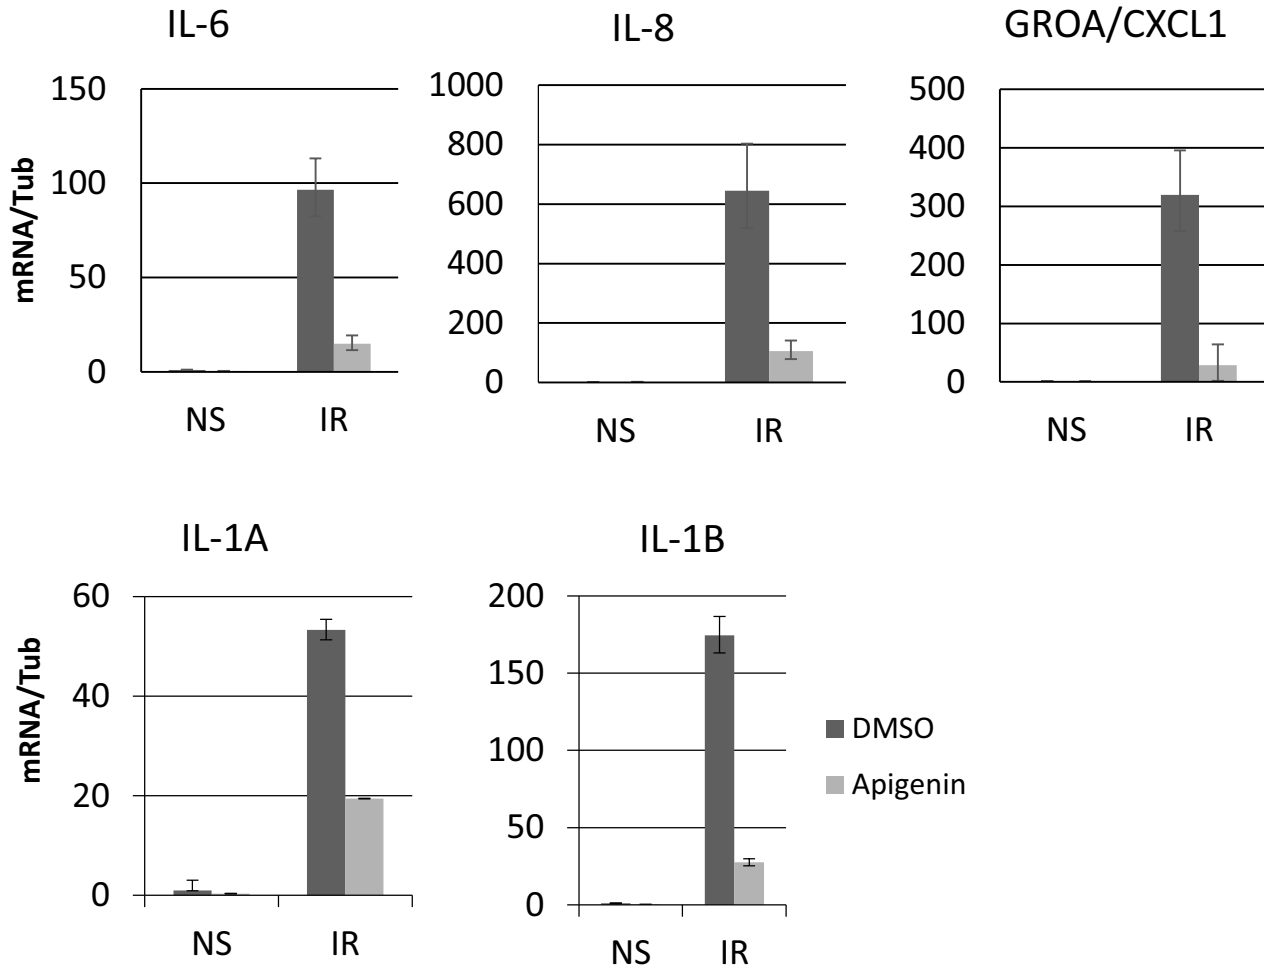

Supplement: 11357_2017_9970_MOESM3_ESM.pdf [file 11357_2017_9970_MOESM3_ESM.pdf]

Figure S4

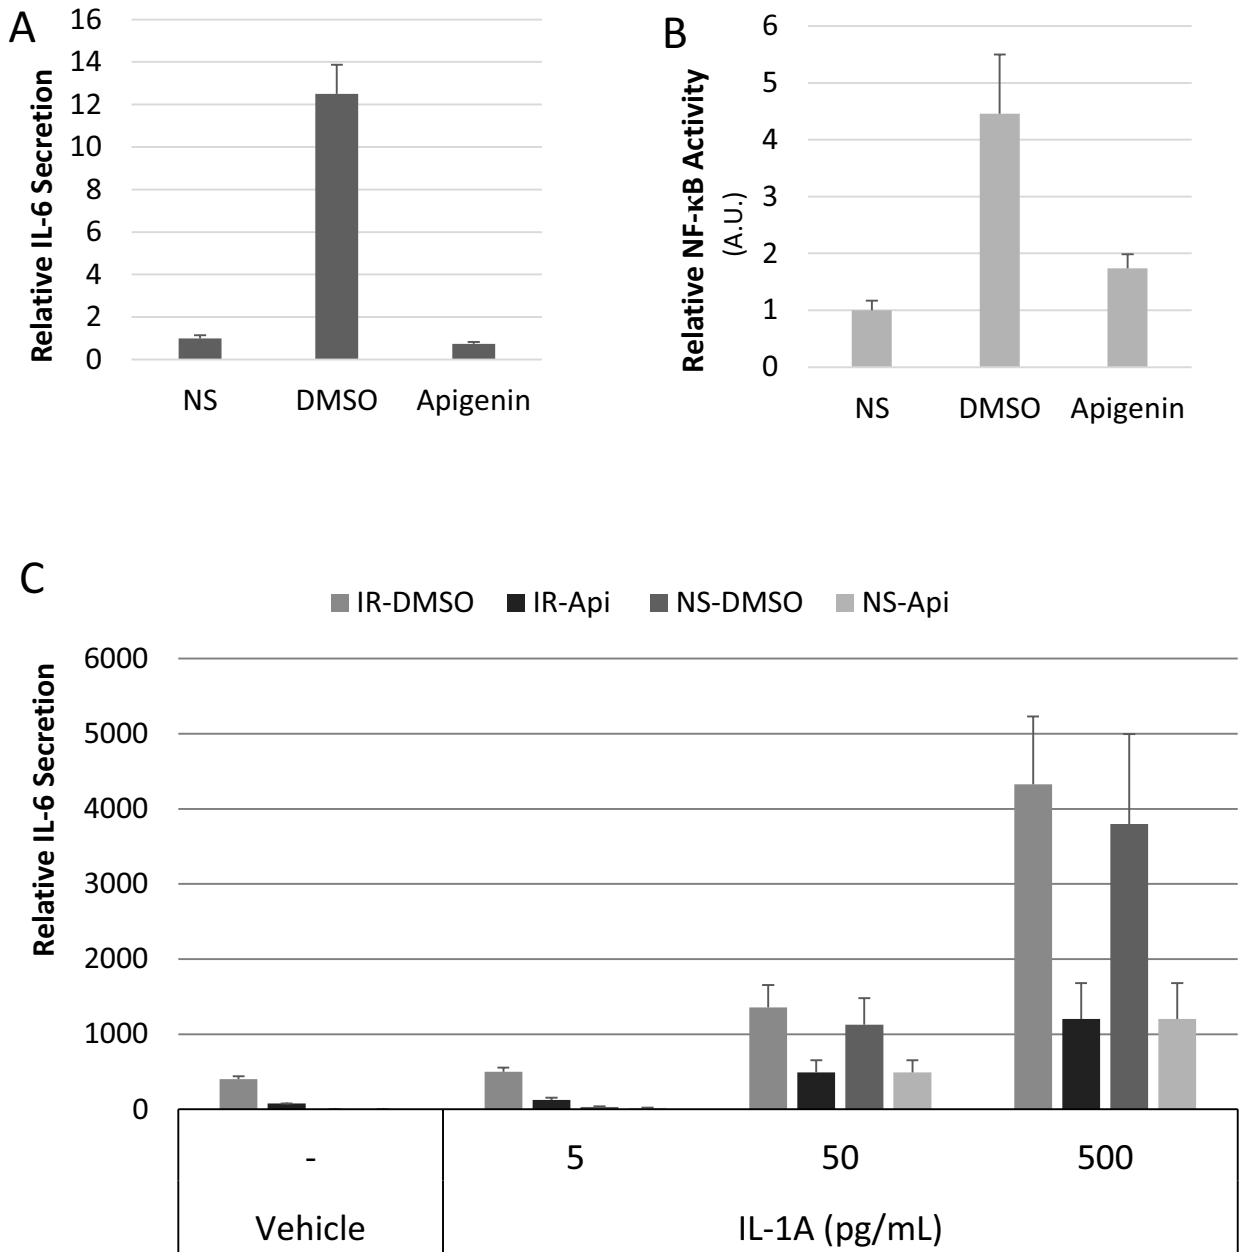

Supplement: 11357_2017_9970_MOESM4_ESM.pdf [file 11357_2017_9970_MOESM4_ESM.pdf]
